# Supplementary material
Source: PubMed Central journal article supplement (PMC4725582)
Supplement: NIHMS749117-supplement-01.pdf [file NIHMS749117-supplement-01.pdf]

**Supplemental Table 1. Logistic regression of the association between Any AF and mortality.**

| <b>Variable</b>                           | <b>Odds Ratio for mortality</b> | <b>95% CI</b> | <b>P value</b>   |
|-------------------------------------------|---------------------------------|---------------|------------------|
| <b>Age (per one year increase)</b>        | 1.007                           | 0.998-1.016   | 0.138            |
| <b>Congestive heart failure</b>           | 0.935                           | 0.634-1.378   | 0.735            |
| <b>Hypertension</b>                       | 0.890                           | 0.680-1.165   | 0.395            |
| <b>APACHE II (per one point increase)</b> | 1.066                           | 1.048-1.083   | <b>&lt;0.001</b> |
| <b>Sepsis</b>                             | 1.690                           | 1.271-2.248   | <b>&lt;0.001</b> |
| <b>Shock</b>                              | 1.837                           | 1.398-2.415   | <b>&lt;0.001</b> |
| <b>Any AF</b>                             | 1.618                           | 1.143-2.289   | <b>0.007</b>     |

CI, confidence interval, APACHE II, Acute Physiology and Chronic Health Evaluation II; AF, atrial fibrillation

**Supplemental Table 2. Logistic regression of New-onset AF, Recurrent AF, and hospital mortality.**

| Variable                           | New-onset AF             |             |                  | Recurrent AF             |             |                  |
|------------------------------------|--------------------------|-------------|------------------|--------------------------|-------------|------------------|
|                                    | Odds Ratio for mortality | 95% CI      | P value          | Odds Ratio for mortality | 95% CI      | P value          |
| Age (per one year increase)        | 1.008                    | 0.998-1.017 | 0.117            | 1.006                    | 0.996-1.016 | 0.254            |
| CHF                                | 0.852                    | 0.548-1.325 | 0.477            | 0.976                    | 0.646-1.476 | 0.910            |
| HTN                                | 0.845                    | 0.641-1.116 | 0.235            | 0.876                    | 0.659-1.165 | 0.364            |
| APACHE II (per one point increase) | 1.066                    | 1.048-1.084 | <b>&lt;0.001</b> | 1.065                    | 1.047-1.084 | <b>&lt;0.001</b> |
| Sepsis                             | 1.678                    | 1.247-2.257 | <b>0.001</b>     | 1.844                    | 1.358-2.503 | <b>&lt;0.001</b> |
| Shock                              | 1.860                    | 1.396-2.479 | <b>&lt;0.001</b> | 1.943                    | 1.460-2.585 | <b>&lt;0.001</b> |
| AF                                 | 1.597                    | 1.030-2.474 | <b>0.036</b>     | 1.661                    | 1.018-2.709 | <b>0.041</b>     |

Regression analysis for New AF compares to patients with No AF and excludes those with Recurrent AF. Regression analysis for Recurrent AF compares to patients with No AF and excludes those with New AF. CI, confidence interval, APACHE II, Acute Physiology and Chronic Health Evaluation II; AF, atrial fibrillation; CHF, congestive heart failure; HTN, hypertension

**Supplemental Table 3. Heart rate and systolic blood pressure in patients treated with either rate-control or rhythm-control therapies for atrial fibrillation.**

|                                 | <b>Rate-control (n=82)</b> | <b>Rhythm-control (n=34)</b> | <b>P value</b> |
|---------------------------------|----------------------------|------------------------------|----------------|
| <b>Frequency of Bradycardia</b> | 23 (28%)                   | 10 (29%)                     | 0.882          |
| <b>Frequency of Hypotension</b> | 59 (72%)                   | 29 (85%)                     | 0.126          |

Analysis was limited to patients who received rate control agents or rhythm control agents, excluding those that received both treatment types. Bradycardia was defined as a minimum recorded heart rate less than 60 beats per minute on any study day. Hypotension was defined as a minimum recorded systolic blood pressure less than 90 mmHg on any study day. Values represent median (interquartile range) or n (%). P values were determined by chi-square test.

**Supplemental Table 4. Summary of publications demonstrating association between atrial fibrillation and increased mortality.**

|                   | Design        | Location                                        | Population                                                                                  | Arrhythmia definition            | Association with Mortality                                                                                        | Reference |
|-------------------|---------------|-------------------------------------------------|---------------------------------------------------------------------------------------------|----------------------------------|-------------------------------------------------------------------------------------------------------------------|-----------|
| Artucio 1990      | Retrospective | General ICU                                     | 2,820 patients<br>419 with AF                                                               | Atrial tachy-arrhythmia (52% AF) | 40% vs. 35%, RR 1.16<br><br>Sepsis subgroup: 70% vs. 51%, RR 1.63                                                 | (2)       |
| Brathwaite 1998   | Prospective   | Surgical ICU, excluding cardiothoracic          | 462 patients<br>47 atrial arrhythmias<br>31 with AF<br>58 with history of atrial arrhythmia | Atrial arrhythmia                | New: 23% vs. 4%, p<0.02<br>History: 9% vs. 3%, p<0.02                                                             | (3)       |
| Reinelt 2001      | Prospective   | Medical surgical ICU, including cardiac surgery | 133 patients<br>108 narrow-complex tachy-arrhythmias<br>63 with AF                          | Any arrhythmia                   | 31% vs. 21%, p=0.061                                                                                              | (10)      |
| Seguin 2004       | Prospective   | Surgical ICU                                    | 460 patients<br>24 with AF                                                                  | AF                               | 38% vs. 18%, p=0.025                                                                                              | (13)      |
| Seguin 2006       | Prospective   | Trauma patients in surgical ICU                 | 293 patients<br>16 with AF                                                                  | AF                               | ICU mortality: 25% vs. 13%, p=0.24<br>Hospital mortality: 31% vs. 15%, p=0.14                                     | (12)      |
| Arora 2007        | Prospective   | Medical and non-cardiac surgical ICUs           | 61 patients<br>18 with AF                                                                   | New AF                           | 56% vs. 21%, RR 2.7, p=0.01                                                                                       | (15)      |
| Goodman 2007      | Prospective   | Multidisciplinary ICU                           | 611 patients<br>52 with new SVT<br>38 with AF                                               | SVT                              | Adjusted hospital mortality not significantly different<br><br>4 year mortality: 71% vs. 32%, p<0.01              | (5)       |
| Annan 2008        | Prospective   | Medical and surgical ICUs                       | 1341 patients<br>113 with SVTs<br>87 with AF                                                | SVT                              | 29% vs. 17%, OR 1.95, p<=0.003, adjusted OR with p=0.277                                                          | (1)       |
| Christian 2008    | Retrospective | Medical-surgical ICU, excluding cardiothoracic  | 274 patients with sepsis<br>16 with New AF                                                  | New AF in sepsis                 | 69% vs. 40%, p=0.034                                                                                              | (4)       |
| Salman 2008       | Retrospective | Medical-surgical ICU                            | 81 patients with sepsis<br>25 with paroxysmal AF                                            | Paroxysmal AF in sepsis          | Hospital mortality: 64% vs. 36%, p=0.081<br><br>28-day mortality: 72% vs. 38%, p=0.004, adjusted OR 3.28, p=0.029 | (11)      |
| Meierhenrich 2010 | Prospective   | Non-cardiac surgical ICU, including trauma      | 687 patients<br>47 with New AF<br>50 with septic shock                                      | New AF in septic shock           | 44 vs. 22%, p=0.14<br><br>After successful treatment: 21% vs. 71%, p=0.015                                        | (9)       |

|             |               |                                              |                                                                              |                         |                                                                         |      |
|-------------|---------------|----------------------------------------------|------------------------------------------------------------------------------|-------------------------|-------------------------------------------------------------------------|------|
| Walkey 2011 | Retrospective | Severe sepsis hospitalizations in California | 49,082 with severe sepsis<br>2,896 with new AF<br>9,986 with pre-existing AF | New AF in severe sepsis | 56% vs. 38%, adjusted RR 1.07<br><br>44% mortality with pre-existing AF | (16) |
| Walkey 2014 | Retrospective | Sepsis hospitalizations in Medicare          | 138,722 sepsis survivors<br>33,646 with prior AF<br>9540 with new AF         | New AF in sepsis        | 5 year mortality: 75% vs. 72%, HR 1.04                                  | (17) |

ICU, intensive care unit; AF, atrial fibrillation; RR, relative risk; SVT, supraventricular tachycardia; HR, hazard ratio; OR, odds

ratio.
